1 **Effects of partial, combined and total replacement of sodium chloride in beef sausage on**  
2 **microbial load, sensory acceptability and physical properties**

3

4 Olusegun D. Oshibanjo \*<sup>1</sup>, Odion O. Ikhimiukor<sup>2</sup>

5 Department of Animal Production, University of Jos, Jos Plateau state, Nigeria<sup>1</sup>

6 Department of Microbiology, University of Ibadan, Ibadan Oyo state, Nigeria<sup>2</sup>

7 [oshibanjoo@unijos.edu.ng](mailto:oshibanjoo@unijos.edu.ng)\*

8 **Summary statement**

9 High intake of sodium chloride had been seen as one of the main contributing factors in the  
10 development of specific, non-transmittable diseases, such as, high blood pressure and related  
11 secondary such as cardiovascular disease. The use of other derivative of salt is therefore  
12 needed. This study evaluates the effects of partial, combined or total replacement of NaCl on  
13 microbial load, sensory evaluation and physical properties of beef sausage.

14

15

16 **Abstract**

17 This study evaluates the effects of partial, combined or total replacement of NaCl on  
18 microbial load, sensory evaluation and physical properties of beef sausage. Beef sausage was  
19 prepared (g/100g: beef 65.0, corn flour 10.0, oil 10.0, soya bean, wet and dry spice 15.0).  
20 Sodium chloride (SC) was replaced with potassium chloride (PC), potassium lactate (PL) or  
21 calcium ascorbate (CA) at 25%, 50% and 100%, and then stored for 15 days in a factorial  
22 arrangement in complete randomized design. Sausages were subjected to microbial load,  
23 sensory evaluation and pH, cooking yield and cooking loss using standard procedure. Data  
24 were analysed using descriptive statistic and ANOVA at  $\alpha_{0.05}$ . The microbial load was  
25 generally lower. The pH increased with storage time. The cooking yield was significantly  
26 higher in salt combination of 50% SC and CA each at storage day 5 with least cooking loss at  
27 same storage day. The most preferred sausage colour was obtained with a salt combination of  
28 50% SC and CA each with least colour in a salt combination of 50% SC, 25% PL and). In  
29 tenderness, a salt combination of 50% of both SC and CA was significantly tender with least  
30 tenderness in 100% PL total replacement. The panelists rated salt combination of 50% SC  
31 and CA as the most overall accepted salt combination than others salt combination. Sodium  
32 chloride replacement with Calcium Ascorbate at 50% enhanced the most preferred sausage

33 for overall acceptability and aerobic bacteria count lower than the international standard  
34 limit.

35 **Keywords:** Sodium chloride, beef sausage, potassium chloride, potassium lactate, calcium  
36 ascorbate (CA).

## 37 **Introduction**

38 A link between increased salt consumption in sodium chloride (NaCl) and increased blood  
39 pressure has been verified in several studies (Sarmugam et al., 2014). The Global Strategy on  
40 Diet, Physical Activity and Health passed by the World Health Organization (WHO, 2004).  
41 identified increased salt consumption as one of the main contributing factors in the  
42 development of specific, non-transmittable diseases, such as, high blood pressure and related  
43 secondary such as cardiovascular disease. Generally, most of the sodium in the human body  
44 comes from salt added during food processing. Many types of processed foods contribute to  
45 the high intake of sodium. Highly and healthier products will be rated higher in taste, only as  
46 long as the consumers do not have to sacrifice palatability. Furthermore, in many  
47 applications, the total exclusion of salt is not possible.

48 Therefore, adequate salt substitutes must feature essential functionalities in taste,  
49 preservation, texture and the color of end products. Importantly, the addition of salts in food  
50 has for a long time been used to inhibit the activity of microorganisms, particularly in  
51 retarding microbial food spoilage and/or food poisoning processes (Rawat, 2015)

52 Due to the importance of salts in food processing, the replacement of sodium salts with other  
53 less harmful salts is imperative. Replacement of Sodium chloride with potassium chloride has  
54 been reported and it's the most commonly used salt to date (Weiss et al., 2010). However,  
55 potassium chloride has a slightly bitter taste, however, to prevent the product from having  
56 unacceptable sensory properties, masking substances are added as additives to the product.  
57 Similarly, flavour enhancers may also be added to the meat product. Flavour enhancers  
58 themselves do not have a salty taste, but may in combination with salt increase the saltiness  
59 of the product. For example, carboxymethylcellulose and carrageenan in combination with  
60 sodium citrate have been shown to enhance saltiness in frankfurters (Weiss et al., 2010 and  
61 Ruusunen et al., 2003a).

62 This study therefore seeks to evaluate the effect of partial, combined and total replacement of  
63 sodium chloride in beef sausage on microbial load, sensory acceptability and physical  
64 properties.

65 **Materials and methods**

66 **Location of the study**

67 The experiment was undertaken at the Animal Product and Processing (Meat Science)  
68 Laboratory of the Department of Animal Science, Faculty of Agriculture, University of  
69 Ibadan, Ibadan.

70 **Beef sausage formulation**

71 Beef sausage was prepared using Table 1.

72 **Salt combination inclusion**

73 Sodium chloride (SC) was replaced with potassium chloride (PC), potassium lactate (PL) or  
74 calcium ascorbate (CA) at 25, 50 and 100% stored at -4<sup>0</sup>C for 15 days as showed in Table 2.

75

76 **Microbial load evaluation**

77 Microbial count was carried out using the pour plate method (Harrigan and McCanee 1976).  
78 A 1 ml dilutions of  $10^{-2}$ · $10^{-4}$  and  $10^{-6}$  were pipetted into molten agar at 45 °C, swirled and  
79 then introduced into sterile Petri dishes and incubated for 24 hours.

80

81 **Sensory evaluation**

82 The nine-point hedonic scale was used by twenty panelists who were trained individuals aged  
83 between 20 and 40 years were used to determined two replicate of the prepared sausage to  
84 assess colour (1-4 dark, 5- intermediate, 6-9 light), tenderness (1-4 tough, 5- intermediate, 6-  
85 9 tender), juiciness (1-4 dry, 5- intermediate, 6-9 juicy), hotness (1-4 less, 5- intermediate, 6-  
86 9 high) and overall acceptability, OA (1-4 low, 5- intermediate, 6-9 high) Mahendrakar et al.,  
87 1988).

88 **Experimental design**

89 Factorial arrangement in complete randomized design.

90 **Statistical Analysis**

91 Data were subjected to analysis of variance using Statistical Analysis System SAS, (2002).  
92 Means were separated using Duncan's Multiple Range Test option of the same software.

93

94 **Results**

95 Table 3 shows the effects of different salts on the microbial count. There were no significant  
96 difference (P<0.05) in all the treatments across the storage days.

97 The interaction effect of salt and storage days on pH value of beef sausage was showed on  
98 Table 4. There were significant difference ( $P>0.05$ ) in all the treatments across the storage  
99 days. Treatment B and O containing 50% Sodium chloride and Potassium chloride and no salt  
100 respectively had the highest pH values at day 15 compared to treatment. It was generally  
101 observed that as the storage days increased there was increase in pH values obtained. Table 5  
102 shows the interaction of salt and storage days on cooking yield of beef sausage. The cooking  
103 yield was significantly higher ( $P>0.05$ ) in Treatment D (50% Sodium chloride and Calcium  
104 ascorbate) at day 5 with least cooking yield in Treatment L (100% Potassium lactate) at day  
105 10. While the cooking loss was significant higher in Treatment L (100% Potassium lactate) at  
106 day 10 with least cooking loss obtained in Treatment D (50% Sodium chloride and Calcium  
107 ascorbate) at day 5.

108 Effect of different salts on sensory evaluation are shown on Figure 1 to 5. The most preferred  
109 sausage colour was obtained with a salt combination of 50% SC and CA each ( $5.60\pm 0.2$ ) with  
110 least colour in a salt combination of 50% SC, 25% PL and CA ( $2.60\pm 0.1$ ). For tenderness, a  
111 salt combination of 50% SC and CA each was significantly tender ( $6.60\pm 0.3$ ) with least  
112 tenderness in 100% PL total replacement. Salt combination of 25% SC, PC, PL and CA each  
113 was most juicy ( $6.30\pm 0.3$ ) while 100% PC total replacement was dry ( $3.80\pm 0.1$ ). The  
114 panelists rated salt combination of 50% SC and CA each as the most overall accepted salt  
115 combination ( $6.8\pm 0.3$ ) with least overall acceptability recorded for a salt combination of 50%  
116 PL and CA ( $3.20\pm 0.1$ ).

117

## 118 Discussion

119 Changes in pH, WHC, and rheological properties are reported to affect storage and  
120 processing quality of the meat. The microbiological stability of high pH meat is poor,  
121 tenderness is more variable, and cooked flavour is inferior (Braggins, 1996).

122 In relation to the acidification process the partial and total replacement of sodium chloride by  
123 potassium chloride, potassium lactate and calcium ascorbate range 5.11% - 6.77% as shown  
124 Table 4, across and among the varying inclusion level of salts and storage days.

125 No salt breakfast sausage had the highest pH value at day 10 while 100% calcium ascorbate  
126 had the lowest at day 0. Consistent pattern was observed as storage days increases there was  
127 increased pH value. Similar result was reported (Hand *et al.*, 1982; Gelabert *et al.*, 2003 and

128 Ruusunen *et al.*, 2003, while Choi *et al.*, 2014 reported higher pH value ranged 6.38 – 7.80.  
129 In contrast, Gimeno *et al.* (2001b) reported a less pH value which ranged between 4.42 –  
130 4.66. Differences in pH could be partially explained by the lactic acid bacteria development.  
131 Salt combination of 50% sodium chloride and calcium ascorbate had the highest cooking  
132 yield at day 5 compared to others, while 100% potassium lactate had the lowest value.  
133 Wettasinghe and Shahidi (1997) investigated the oxidative stability, cooking yield, and  
134 texture of low pork treated with low sodium salt mixture consisting of NaCl, KCl, MgSO<sub>4</sub>,  
135 and lysine hydrochloride. The cooking yield of products containing 1% low sodium salt  
136 mixture was lower than the product with 1% sodium chloride; however, at 2 and 3% level of  
137 mixture, it was similar to that of the product with 2 and 3% sodium chloride. The result  
138 obtained in this study could be due to the synergy of sodium chloride and calcium ascorbate  
139 to increase retention of water by the protein structure in the presence of chloride ions. The  
140 chloride ion is much more important than the sodium ion for achieving increased water  
141 binding by meat protein.  
142 Cooking loss is a combination of liquid and soluble matter which is lost from the meat and  
143 meat product such as breakfast sausage during cooking. Cooking loss obtained in this study  
144 ranges from 11.72% - 34.86% as shown Table 6, was far below cooking loss reported by  
145 Choi *et al.* (2014) which ranges from 2.33% - 3.19%. Since salt (NaCl) aid water binding  
146 through the help of soluble protein. The high level of cooking loss obtained in this study  
147 was found in sausage without salt. This could be due to lack of salt in the product.  
148 The panelists were able to distinguish a difference in colour, tenderness and overall  
149 acceptability among the treatment (Figure 1 - 5). The effects of replacing NaCl by KCl,  
150 potassium lactate and glycine on physicochemical, microbiological, and sensory properties of  
151 fermented sausages were studied.. In this study, the combination of 50% sodium chloride and  
152 calcium ascorbate was rated high which could be attributed to calcium ascorbate ability to fix  
153 colour and the synergy between sodium chloride and calcium ascorbate reduced spiciness of  
154 the breakfast sausage thus making the product more tender. There were no significant

155 differences in the microbial load. This could be due to the ability of salt to reduce or inhibit  
156 the growth of microbes (Oshibanjo, 2017).

157 Gelabert et al., 2003 reported that replacement of 50% of the NaCl with KCl in frankfurter  
158 provided acceptable flavour without excessive bitterness, while Hand et al., 1982a observed  
159 similar results by replacing 35% of NaCl with KCl. Hand et al., 1982b investigated the  
160 effects of chloride salts of potassium and magnesium by replacing all (100%) or part (35%)  
161 of NaCl in mechanically deboned turkey frankfurters. At substitution levels, higher than 30%  
162 with potassium lactate and higher than 50% with glycine, a loss of cohesiveness was noticed  
163 by the sensory analysis in fermented sausages.

164

### 165 **Conclusion**

166 Sodium chloride replacement with Calcium Ascorbate at 50% enhanced the most preferred  
167 sausage for overall acceptability and aerobic bacteria count lower than the international  
168 standard limit.

169

### 170 *Acknowledgements*

171 I acknowledged the laboratory technologists of Microbiology and Animal science  
172 Department that assisted in carried out this result in the laboratory.

### 173 *Competing interests*

174 No competing interests declared.

### 175 *Funding*

176 This research received no specific grant from any funding agency in the public, commercial  
177 or not-for-profit sectors’.

178

179

180

181

182

183

184

185

186 **References**

187 **Braggins, T. J.** (1996). Effect of stress-related changes in sheep meat ultimate PH  
188 on cooked odor and flavor. *Food Chem.*;44:2352–2360

189

190 **Choi, Y. S., Kim, H. W., Hwang, K. E., Song D. H., Choi J. H., Lee M. A.,**  
191 **Chung H. J., Kim C. J.** (2014). Physicochemical properties and sensory characteristics of  
192 reduced-fat frankfurters with pork back fat replaced by dietary fiber extracted from makgeolli  
193 lees. *Meat Sci.* ;96:892–900.

194

195 **Gelabert, J., Gou P., Guerrero, L., and Arnau, J.** (2003). Effect of sodium  
196 chloride replacement on some characteristics of fermented sausages. *Meat Sci.* 65:833–839.

197

198 **Gimeno, O., Astiasar´an, I., and Bello, J.** (2001b). Calcium ascorbate as a  
199 potential partial substitute for NaCl in dry fermented sausages: Effect on color, texture, and  
200 hygienic quality at different concentrations. *Meat Sci.* 57: 23–29.

201

202 **Hand, L. W., Terrell, R. N., and Smith, G. C.** (1982a).Effects of Chloride Salt,  
203 Method of Manufacturing and Frozen Storage on Sensory Properties of Restructured Pork  
204 Roasts. *Journal of Food Science*, 47, 1771-1772

205

206 **Hand, L. W., Terrell, R. N., and Smith, G. C.** (1982b). Effects of chloride salts on  
207 physical, chemical and sensory properties of frankfurters. *Journal of Food Science*, 47, 1800-  
208 1802.

209

210 **Harrigan, W. F and McCanee, M. E.** (1976).Laboratory methods in food and  
211 dairy microbiology, Academic Press, London, pp 17-68.

212

213 **Mahendrakar, N.S., Khabade, U.S and Dam, N.P** (1988).Studies on the effect of  
214 fattening on carcass characteristics and quality of meat from Bannur lambs. *J. Food Sci. Tech.*  
215 25: 225-231.

216 **Oshibanjo, D. O.** (2017). Yield and quality characteristics of breakfast sausage  
217 prepared with different dietary flours, salts and oils. *PhD thesis*, University of Ibadan, Ibadan  
218 Oyo.

219

220 **Rawat, S.** (2015)Food Spoilage: Microorganisms and their prevention. *Asian*  
221 *Journal of Plant Science and Research* 5(4):47-56

222

223           **Ruusunen, M., Vainionpaa, J., Puolanne, E., Lyly, M., Lahteenmaki,**  
224 **L.,Niemisto , M., and Ahvenainen, R.** (2003a). Physical and sensory properties of low-salt  
225 phosphate-free frankfurters composed with various ingredients. *Meat Sci.* 63: 9–16

226  
227           **Ruusunen, M., Vainionpaa, J., Puolanne, E., Lyly, M., Lahteenmaki,**  
228 **L.,Niemisto , M., and Ahvenainen, R.** (2003a). Physical and sensory properties of low-salt  
229 phosphate-free frankfurters composed with various ingredients. *Meat Sci.* 63: 9–16.

230  
231           **Sarmugam, R., Worsley, A. and Flood, V.** (2014). Development and validation of  
232 a salt knowledge questionnaire. *Public Health Nutrition*, 17 (5), 1061-1068

233  
234           **SAS** (2002). *SAS User's Guide: Basic statistical analysis*. Cary, NC, USA:  
235 Statistical Analysis Systems Institute

236  
237           **Weiss Jochen, MonikeGibis, Valerie Schuh and Hanna Salminen**  
238 (2010).Advances in ingredient and processing systems for meat and meat products. *Meat*  
239 *science J.* Vol 86:1 pg 196- 213.

240  
241           **Wettasinghe, M. and Shahidi, F.** (1997). Oxidative stability, cooking yield and  
242 texture of pork treated with a low-sodium salt. *Journal of Muscle food.* Volume8, issue4  
243 pages 373-382

244  
245           **WHO** (2004). Diet, nutrition and the prevention of chronic disease, Report of a  
246 Joint WHO/FAO Expert Consultation. WHO Technical Report Series: World Health  
247 Organization, Geneva

248  
249  
250  
251  
252  
253  
254  
255  
256  
257  
258



259 **Table 1: Beef sausage formulation**

| Ingredients (%)   | Inclusion level |
|-------------------|-----------------|
| Beef              | 65.00           |
| Lard              | 10.00           |
| Corn flour        | 10.00           |
| Curing salt       | 2.00            |
| Sugar             | 1.00            |
| Binder(soya bean) | 3.50            |
| Phosphate         | 0.30            |
| Ice water         | 4.00            |
| Dry spices        | 2.00            |
| Green spices      | 2.20            |
| Total             | 100.00          |

260

261

262

263

264

265

266

267

268

269

270

271

272

273

274

275

276

277

278

279 **Table 2: salt combination inclusion levels**

|          | <b>NaCl</b> |              | <b>K-</b>      | <b>Ca</b>        | <b>-</b> |
|----------|-------------|--------------|----------------|------------------|----------|
|          | <b>%</b>    | <b>KCl %</b> | <b>LACTATE</b> | <b>ASCORBATE</b> |          |
| <b>A</b> | 100.00      | –            | –              | –                |          |
| <b>B</b> | 50.00       | 50.00        | –              | –                |          |
| <b>C</b> | 50.00       | –            | 50.00          | –                |          |
| <b>D</b> | 50.00       | –            | –              | 50.00            |          |
| <b>E</b> | 25.00       | 25.00        | 25.00          | 25.00            |          |
| <b>F</b> | –           | 50.00        | 50.00          | –                |          |
| <b>G</b> | –           | 50.00        | –              | 50.00            |          |
| <b>H</b> | –           | 50.00        | 25.00          | 25.00            |          |
| <b>I</b> | –           | 25.00        | 50.00          | 25.00            |          |
| <b>J</b> | –           | 25.00        | 25.00          | 50.00            |          |
| <b>K</b> | –           | 100.00       | –              | –                |          |
| <b>L</b> | –           | –            | 100.00         | –                |          |
| <b>M</b> | –           | –            | –              | 100.00           |          |
| <b>N</b> | –           | –            | 50.00          | 50.00            |          |
| <b>O</b> | –           | –            | –              | –                |          |

280

281

282 **Table 3: Interaction effect of different salt and storage days on microbial count of beef sausage (Log10CFU/ml)**

| PARAMETER             | DAYS  | A    | B    | C    | D    | E    | F    | G    | H    | I    | J    | K    | L    | M    | N    | O    | SEM  |
|-----------------------|-------|------|------|------|------|------|------|------|------|------|------|------|------|------|------|------|------|
| <b>Aerobic</b>        |       |      |      |      |      |      |      |      |      |      |      |      |      |      |      |      |      |
| <b>bacteria count</b> |       |      |      |      |      |      |      |      |      |      |      |      |      |      |      |      |      |
| (log/CFU)             | Day 0 | 0.00 | 0.20 | 0.20 | 0.70 | 0.90 | 0.20 | 0.00 | 0.00 | 0.10 | 0.20 | 0.00 | 0.10 | 0.00 | 0.10 | 1.00 | 0.00 |
|                       | Day 5 | 0.00 | 0.10 | 0.30 | 0.20 | 0.50 | 0.90 | 0.00 | 0.00 | 0.00 | 0.10 | 0.10 | 0.20 | 0.30 | 0.10 | 1.20 | 0.00 |
|                       | Day   |      |      |      |      |      |      |      |      |      |      |      |      |      |      |      |      |
|                       | 10    | 0.00 | 0.30 | 0.80 | 0.80 | 0.80 | 0.30 | 0.80 | 0.70 | 0.30 | 0.00 | 0.00 | 0.60 | 0.00 | 0.30 | 1.00 | 0.00 |
|                       | SEM   | 0.00 | 0.00 | 0.00 | 0.00 | 0.00 | 0.00 | 0.00 | 0.00 | 0.00 | 0.00 | 0.00 | 0.00 | 0.00 | 0.00 | 0.00 | 0.00 |

283 **A=** 100% Sodium chloride, **B =** 50% Sodium chloride & Potassium chloride, **C =** 50% Sodium chloride & Potassium lactate, **D=** 50% Sodium  
 284 chloride & Calcium ascorbate, **E =** 25% sodium chloride, potassium chloride, Potassium lactate & Calcium ascorbate each, **F=** 50% Potassium  
 285 chloride and Potassium lactate each, **G=** 50% potassium chloride & Calcium ascorbate each and **H =** 50% sodium chloride, 25% Potassium  
 286 lactate & Calcium ascorbate, **I=** 25 % potassium chloride, Calcium ascorbate & 50 % Potassium lactate, **J =** 25 % potassium chloride, Potassium  
 287 lactate & 50% Calcium ascorbate, **K =** 100% potassium chloride, **L=** 100% Potassium lactate, **M=** 100% Calcium ascorbate, **N=** 50%  
 288 Potassium lactate & Calcium ascorbate, **O=** NO salt.

289

290

291

292

293

294

295

296

297

298

300 **Table 4: Interaction effect of different salt and storage days on pH of beef sausage**

| PARAMETER | DAYS   | A                   | B                    | C                    | D                   | E                    | F                   | G                    | H                    | I                    | J                    | K                    | L                     | M                   | N                    | O                  | SEM  |
|-----------|--------|---------------------|----------------------|----------------------|---------------------|----------------------|---------------------|----------------------|----------------------|----------------------|----------------------|----------------------|-----------------------|---------------------|----------------------|--------------------|------|
| pH        | Day 0  | 5.18 <sup>cDE</sup> | 5.34 <sup>cCDE</sup> | 5.27 <sup>cCDE</sup> | 5.80 <sup>aAB</sup> | 5.08 <sup>cE</sup>   | 5.13 <sup>cDE</sup> | 5.59 <sup>bAC</sup>  | 5.12 <sup>cDE</sup>  | 5.46 <sup>bBCD</sup> | 5.47 <sup>bBCD</sup> | 5.20 <sup>cDE</sup>  | 5.44 <sup>bBCDE</sup> | 5.11 <sup>bDE</sup> | 5.86 <sup>bA</sup>   | 6.33 <sup>cA</sup> | 0.04 |
|           | Day 5  | 5.68 <sup>bAB</sup> | 5.65 <sup>bAB</sup>  | 5.95 <sup>bA</sup>   | 5.54 <sup>bB</sup>  | 5.55 <sup>bB</sup>   | 5.60 <sup>bAB</sup> | 5.55 <sup>bB</sup>   | 5.57 <sup>bB</sup>   | 5.61 <sup>bAB</sup>  | 5.57 <sup>bB</sup>   | 5.58 <sup>bAB</sup>  | 5.49 <sup>bB</sup>    | 5.37 <sup>bB</sup>  | 5.50 <sup>cB</sup>   | 6.56 <sup>bA</sup> | 0.03 |
|           | Day 10 | 6.35 <sup>aAB</sup> | 6.40 <sup>aA</sup>   | 6.34 <sup>aAB</sup>  | 6.03 <sup>aBC</sup> | 6.23 <sup>aABC</sup> | 6.38 <sup>aAB</sup> | 6.14 <sup>aABC</sup> | 6.24 <sup>aABC</sup> | 6.37 <sup>aAB</sup>  | 6.21 <sup>aABC</sup> | 6.29 <sup>aABC</sup> | 6.26 <sup>aABC</sup>  | 5.94 <sup>aC</sup>  | 6.12 <sup>aABC</sup> | 6.77 <sup>aA</sup> | 0.02 |
|           | SEM    | 0.16                | 0.16                 | 0.19                 | 0.08                | 0.19                 | 0.18                | 0.10                 | 0.16                 | 0.14                 | 0.11                 | 0.16                 | 0.13                  | 0.12                | 0.09                 | 0.16               |      |

301 **A=** 100% Sodium chloride, **B =** 50% Sodium chloride & Potassium chloride, **C =** 50% Sodium chloride & Potassium lactate, **D=** 50% Sodium  
302 chloride & Calcium ascorbate, **E =** 25% sodium chloride, potassium chloride, Potassium lactate & Calcium ascorbate each, **F=** 50% Potassium  
303 chloride and Potassium lactate each, **G=** 50% potassium chloride & Calcium ascorbate each and **H =** 50% sodium chloride, 25% Potassium  
304 lactate & Calcium ascorbate, **I=** 25 % potassium chloride, Calcium ascorbate & 50 % Potassium lactate, **J =** 25 % potassium chloride, Potassium  
305 lactate & 50% Calcium ascorbate, **K =** 100% potassium chloride, **L=** 100% Potassium lactate, **M=** 100% Calcium ascorbate, **N=** 50%  
306 Potassium lactate & Calcium ascorbate, **O=** NO salt.

307

308

309

310

311

312

313

314

315

316

317 **Table 5: Interaction effect of different salt and storage days on cooking yield of beef sausage**

| PARAMETER          | DAYS   | A                   | B                   | C                   | D                    | E                   | F                   | G                    | H                   | I                   | J                    | K                   | L                   | M                   | N                   | O                   | SEM  |
|--------------------|--------|---------------------|---------------------|---------------------|----------------------|---------------------|---------------------|----------------------|---------------------|---------------------|----------------------|---------------------|---------------------|---------------------|---------------------|---------------------|------|
| COOKING<br>YIELD % | Day 0  | 76.89 <sup>bH</sup> | 80.48 <sup>aD</sup> | 79.10 <sup>bF</sup> | 86.60 <sup>aA</sup>  | 79.05 <sup>bF</sup> | 78.16 <sup>aG</sup> | 82.18 <sup>bC</sup>  | 83.95 <sup>bB</sup> | 79.69 <sup>cE</sup> | 74.48 <sup>cI</sup>  | 81.79 <sup>aC</sup> | 77.77 <sup>bG</sup> | 72.27 <sup>bJ</sup> | 71.61 <sup>cL</sup> | 72.27 <sup>bJ</sup> | 0.63 |
|                    | Day 5  | 86.71 <sup>aB</sup> | 79.98 <sup>bG</sup> | 83.52 <sup>aD</sup> | 88.28 <sup>aA</sup>  | 86.40 <sup>aB</sup> | 76.75 <sup>bJ</sup> | 83.09 <sup>bDF</sup> | 85.07 <sup>aC</sup> | 81.25 <sup>bF</sup> | 79.38 <sup>aH</sup>  | 74.26 <sup>bM</sup> | 83.07 <sup>aE</sup> | 76.05 <sup>aL</sup> | 78.90 <sup>aI</sup> | 76.05 <sup>aL</sup> | 0.64 |
|                    | Day 10 | 72.07 <sup>cH</sup> | 79.28 <sup>cB</sup> | 77.13 <sup>cC</sup> | 76.21 <sup>cDE</sup> | 72.00 <sup>cH</sup> | 72.02 <sup>cH</sup> | 76.31 <sup>cD</sup>  | 79.04 <sup>cB</sup> | 83.79 <sup>aA</sup> | 75.82 <sup>bEF</sup> | 72.90 <sup>cG</sup> | 65.14 <sup>cJ</sup> | 66.34 <sup>cI</sup> | 75.75 <sup>bF</sup> | 66.34 <sup>cI</sup> | 0.74 |
|                    | SEM    | 2.13                | 0.17                | 1.72                | 1.12                 | 2.09                | 0.93                | 1.51                 | 0.93                | 0.60                | 0.73                 | 1.38                | 2.66                | 1.41                | 1.06                | 1.41                |      |

318 **A**= 100% Sodium chloride, **B** = 50% Sodium chloride & Potassium chloride, **C** = 50% Sodium chloride & Potassium lactate, **D**= 50% Sodium  
319 chloride & Calcium ascorbate, **E** = 25% sodium chloride, potassium chloride, Potassium lactate & Calcium ascorbate each, **F**= 50% Potassium  
320 chloride and Potassium lactate each, **G**= 50% potassium chloride & Calcium ascorbate each and **H** = 50% sodium chloride, 25% Potassium  
321 lactate & Calcium ascorbate, **I**= 25 % potassium chloride, Calcium ascorbate & 50 % Potassium lactate, **J** = 25 % potassium chloride, Potassium  
322 lactate & 50% Calcium ascorbate, **K** = 100% potassium chloride, **L**= 100% Potassium lactate, **M**= 100% Calcium ascorbate, **N**= 50%  
323 Potassium lactate & Calcium ascorbate, **O**= NO salt.

324

325

326

327

328

329

330

331

332

333

334

335

336

337

338 **Table 6: Interaction effect of different salt and storage days on cooking loss of beef sausage**

339

| PARAMETER         | DAYS   | A                   | B                   | C                   | D                    | E                   | F                   | G                   | H                   | I                   | J                    | K                   | L                   | M                   | N                   | O                   | SEM  |
|-------------------|--------|---------------------|---------------------|---------------------|----------------------|---------------------|---------------------|---------------------|---------------------|---------------------|----------------------|---------------------|---------------------|---------------------|---------------------|---------------------|------|
| COOKING<br>LOSS % | Day 0  | 23.11 <sup>bd</sup> | 19.52 <sup>ch</sup> | 20.90 <sup>bf</sup> | 13.40 <sup>cl</sup>  | 20.95 <sup>bf</sup> | 21.84 <sup>ce</sup> | 17.82 <sup>bi</sup> | 16.05 <sup>bj</sup> | 20.31 <sup>af</sup> | 25.52 <sup>ac</sup>  | 18.21 <sup>ci</sup> | 22.23 <sup>be</sup> | 27.73 <sup>bb</sup> | 28.39 <sup>aa</sup> | 27.73 <sup>bb</sup> | 0.63 |
|                   | Day 5  | 13.29 <sup>cl</sup> | 20.02 <sup>bf</sup> | 16.48 <sup>ci</sup> | 11.72 <sup>cm</sup>  | 13.60 <sup>cl</sup> | 23.25 <sup>bc</sup> | 16.91 <sup>bh</sup> | 14.93 <sup>cj</sup> | 18.75 <sup>bg</sup> | 20.62 <sup>ce</sup>  | 25.74 <sup>ba</sup> | 16.93 <sup>ch</sup> | 23.95 <sup>cb</sup> | 21.10 <sup>cd</sup> | 23.95 <sup>cb</sup> | 0.64 |
|                   | Day 10 | 27.93 <sup>ac</sup> | 20.72 <sup>ai</sup> | 22.87 <sup>ah</sup> | 23.79 <sup>afg</sup> | 28.00 <sup>ac</sup> | 27.98 <sup>ac</sup> | 23.69 <sup>ag</sup> | 20.96 <sup>ai</sup> | 16.21 <sup>ci</sup> | 24.18 <sup>bef</sup> | 27.10 <sup>ad</sup> | 34.86 <sup>aa</sup> | 33.66 <sup>ab</sup> | 24.25 <sup>be</sup> | 33.66 <sup>ab</sup> | 0.74 |
|                   | SEM    | 2.13                | 0.17                | 1.72                | 1.12                 | 2.09                | 0.93                | 1.51                | 0.93                | 0.60                | 0.73                 | 1.38                | 2.66                | 1.41                | 1.06                | 1.41                |      |

340 **A**= 100% Sodium chloride, **B** = 50% Sodium chloride & Potassium chloride, **C** = 50% Sodium chloride & Potassium lactate, **D**= 50% Sodium  
341 chloride & Calcium ascorbate, **E** = 25% sodium chloride, potassium chloride, Potassium lactate & Calcium ascorbate each, **F**= 50% Potassium  
342 chloride and Potassium lactate each, **G**= 50% potassium chloride & Calcium ascorbate each and **H** = 50% sodium chloride, 25% Potassium  
343 lactate & Calcium ascorbate, **I**= 25 % potassium chloride, Calcium ascorbate & 50 % Potassium lactate, **J** = 25 % potassium chloride, Potassium  
344 lactate & 50% Calcium ascorbate, **K** = 100% potassium chloride, **L**= 100% Potassium lactate, **M**= 100% Calcium ascorbate, **N**= 50%  
345 Potassium lactate & Calcium ascorbate, **O**= NO salt.

346 **Figures**

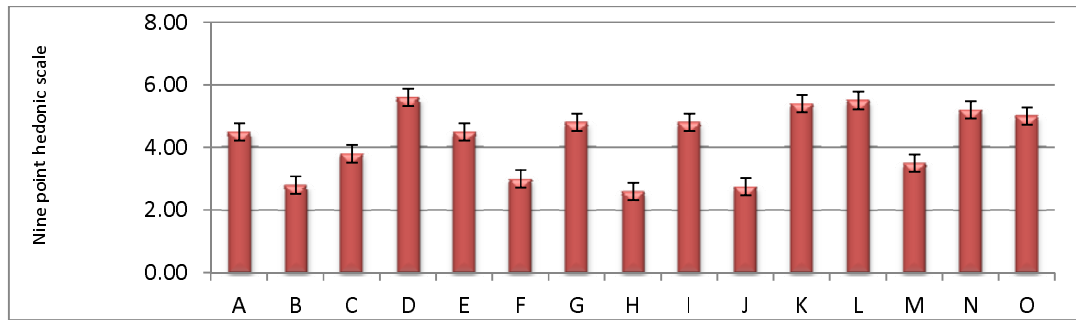

347

348 **Figure 1: Effect of different salts on sausage colour**

349 **A**= 100% Sodium chloride, **B** = 50% Sodium chloride & Potassium chloride, **C** = 50%  
350 Sodium chloride & Potassium lactate, **D**= 50% Sodium chloride & Calcium ascorbate, **E** =  
351 25% sodium chloride, potassium chloride, Potassium lactate & Calcium ascorbate each, **F**=  
352 50% Potassium chloride and Potassium lactate each, **G**= 50% potassium chloride & Calcium  
353 ascorbate each and **H** = 50% sodium chloride, 25% Potassium lactate & Calcium ascorbate,  
354 **I**= 25 % potassium chloride, Calcium ascorbate & 50 % Potassium lactate, **J** = 25 %  
355 potassium chloride, Potassium lactate & 50% Calcium ascorbate, **K** = 100% potassium  
356 chloride, **L**= 100% Potassium lactate, **M**= 100% Calcium ascorbate, **N**= 50% Potassium  
357 lactate & Calcium ascorbate, **O**= NO salt

358

359

360

361

362

363

364

365

366

367

368

369

370

371

372

373

374

375

376

377

378

379

380

381

382

383

384

385

386

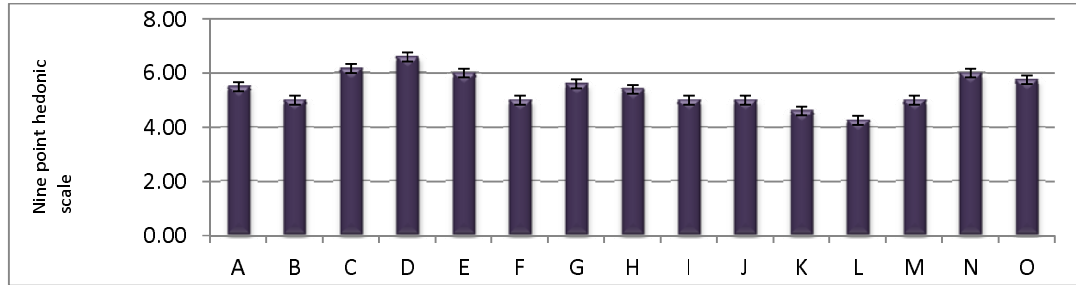

387

388 **Figure 2: Effect of different salts on sausage tenderness**

389 **A**= 100% Sodium chloride, **B** = 50% Sodium chloride & Potassium chloride, **C** = 50%  
390 Sodium chloride & Potassium lactate, **D**= 50% Sodium chloride & Calcium ascorbate, **E** =  
391 25% sodium chloride, potassium chloride, Potassium lactate & Calcium ascorbate each, **F**=  
392 50% Potassium chloride and Potassium lactate each, **G**= 50% potassium chloride & Calcium  
393 ascorbate each and **H** = 50% sodium chloride, 25% Potassium lactate & Calcium ascorbate,  
394 **I**= 25 % potassium chloride, Calcium ascorbate & 50 % Potassium lactate, **J** = 25 %  
395 potassium chloride, Potassium lactate & 50% Calcium ascorbate, **K** = 100% potassium  
396 chloride, **L**= 100% Potassium lactate, **M**= 100% Calcium ascorbate, **N**= 50% Potassium  
397 lactate & Calcium ascorbate, **O**= NO salt

398

399

400

401

402

403

404

405

406

407

408

409

410

411

412

413

414

415

416

417



418

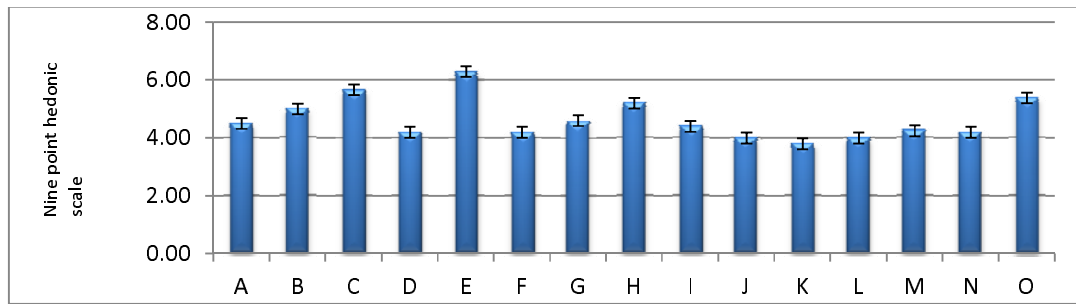

419

420 **Figure 3: Effect of different salts on sausage juiciness**

421 **A**= 100% Sodium chloride, **B** = 50% Sodium chloride & Potassium chloride, **C** = 50%  
422 Sodium chloride & Potassium lactate, **D**= 50% Sodium chloride & Calcium ascorbate, **E** =  
423 25% sodium chloride, potassium chloride, Potassium lactate & Calcium ascorbate each, **F**=  
424 50% Potassium chloride and Potassium lactate each, **G**= 50% potassium chloride & Calcium  
425 ascorbate each and **H** = 50% sodium chloride, 25% Potassium lactate & Calcium ascorbate,  
426 **I**= 25 % potassium chloride, Calcium ascorbate & 50 % Potassium lactate, **J** = 25 %  
427 potassium chloride, Potassium lactate & 50% Calcium ascorbate, **K** = 100% potassium  
428 chloride, **L**= 100% Potassium lactate, **M**= 100% Calcium ascorbate, **N**= 50% Potassium  
429 lactate & Calcium ascorbate, **O**= NO salt

430

431

432

433

434

435

436

437

438

439

440

441

442

443

444

445

446

447

448

449

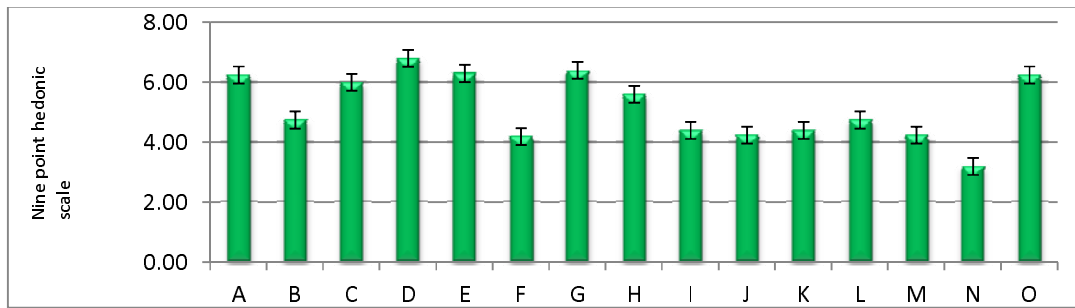

450

451 **Figure 4: Effect of different salts on overall acceptability**  
452 **A**= 100% Sodium chloride, **B** = 50% Sodium chloride & Potassium chloride, **C** = 50%  
453 Sodium chloride & Potassium lactate, **D**= 50% Sodium chloride & Calcium ascorbate, **E** =  
454 25% sodium chloride, potassium chloride, Potassium lactate & Calcium ascorbate each, **F**=  
455 50% Potassium chloride and Potassium lactate each, **G**= 50% potassium chloride & Calcium  
456 ascorbate each and **H** = 50% sodium chloride, 25% Potassium lactate & Calcium ascorbate,  
457 **I**= 25 % potassium chloride, Calcium ascorbate & 50 % Potassium lactate, **J** = 25 %  
458 potassium chloride, Potassium lactate & 50% Calcium ascorbate, **K** = 100% potassium  
459 chloride, **L**= 100% Potassium lactate, **M**= 100% Calcium ascorbate, **N**= 50% Potassium  
460 lactate & Calcium ascorbate, **O**= NO salt.  
461
